# Supplementary material for: Characterization of Toxoplasma DegP, a rhoptry serine protease crucial for lethal infection in mice
Source: PubMed Central journal article supplement (PMC5731766; doi:10.1371/journal.pone.0189556), 2017-12-15
Supplement: pone.0189556.s002.pdf [file pone.0189556.s002.pdf]

**A**

PfDegP 1 MDIIFCTPTYCKIMLMIIMLI-----SLRTRCDTNNF-----LN  
PvDegP 1 MKLSLQSYSCCAAVAALVVIRGGGDPWGGFFPRCAAHQMGERPPPTDERNYAENNGGKLG  
PcynDegP 1 -----  
EtDegP 1 -----  
TpDegP 1 -----  
BbDegP 1 -----  
NcDegP 1 -----MMAEQRDRSQRARWTAR-----  
TgDegP 1 -----  
HhDegP 1 -----MAALQRSRWPRAR-----TG---

PfDegP 35 CSVEKEEGEEEEIISTNLKRINDDM-----NILGRILNDER  
PvDegP 61 GEIEKEEEEHLHIDREVKGDDSHFTFDESSPTGGGKNVKVGLPLAKYTPGYVRPVLSDKR  
PcynDegP 1 -----  
EtDegP 1 -----  
TpDegP 1 -----  
BbDegP 1 -----  
NcDegP 18 -----ALF-----LLAWLAVGLEMLFWNSNSSFVCPKAHA  
TgDegP 1 -----ML-----LLLSLVFALEVSSWISSDSVVSLKAHG  
HhDegP 16 -----MVL-----LLLSVFALEVPSWIASYSVVPLKAHG

PfDegP 70 -----NIKITDI-----VEM----LQNEYDDKKKKK  
PvDegP 121 VTKGEAPG----GENNLPSPGDPQDGPYLSKQQCGASFRDNAKADEHPSEGSHHDGEEPP  
PcynDegP 1 -----  
EtDegP 1 -----  
TpDegP 1 -----  
BbDegP 1 -----  
NcDegP 48 VEVSSSSAERSFSPASTHSPGPRDAAPKLEA-----ASDGQTPL  
TgDegP 30 AEASSLLT-----PEPS-----  
HhDegP 46 AETSLLT-----PEPS-----

PfDegP 92 KKKKYIYRKKKSNNKINEINSVQHFNVKENILNEKK----KNPLNDNFKNPKLRKHSPN  
PvDegP 177 SAAPNIWRRKKKNILQHRMSPTERGOEGYPPVEEKQTHREASNSDGSNLHESNFRGG-SS  
PcynDegP 1 -----MNPTEHHLMDYSLMKDKQIHRGETLNS----YVNNIDDH-NS  
EtDegP 1 -----  
TpDegP 1 -----  
BbDegP 1 -----  
NcDegP 87 AS-DTLFLDPST-TSTDEGSAEERF---QELEEDEFEHS---TSG-----TAQHSPR  
TgDegP 42 -----R-----DI RE-----  
HhDegP 58 -----R-----DI RE-----

PfDegP 147 NKKNKNKIGQ- IKFHIVGYDKKKITKYLTPSMISSIQKRLMNKNKKTN-----  
PvDegP 236 YTEGSHQVGQ-LKLRITNRDDQKMMKGIFTQOVVRAMKEYLLKGGKKYGSGQVGHLCSSD  
PcynDegP 38 KRRMQPRVGK-LKLRINRDKKTIIRDTLTQOVVKVMKEYLLKGRKKYRNGQMDHLGCIS  
EtDegP 1 -----MRIILALSLSITATFVDS-----YLLVTNEVGN----GTPASS--  
TpDegP 1 -----  
BbDegP 1 -----  
NcDegP 131 EDIAVPQDGSESPFTAFISESEPEGESFEPS-----T-RIPREPTE----ETPAEFSF  
TgDegP 47 DATVLHEDGFVSTFPAAVATSAHGAEPLPE-----R-EITEEV TG----EMLVCSL  
HhDegP 63 DAAVLHEDGFVSTFPAAVATSAQVAEQLPTE-----R-EITEEVAG----EMLVCSL

PfDegP 194 -----VNVNMSNGRVL PFFPKKEYFLHSSTHEKKDKMATKKN  
PvDegP 295 QOHGGDRRTGSNQAIHPLSGEAIHPLSSEAIHPLRFFFPANFAPHSGDSQ-----RGA  
PcynDegP 97 DQLDRRDTGTGWGSS-----WSGSSKVNRLRFFFPANFAPHSGDNQ-----RGA  
EtDegP 35 -----ASTGNGG-----VSLGFKD  
TpDegP 1 -----  
BbDegP 1 -----MA  
NcDegP 179 LQVNAAAALAKGQ-----ISPSRIE  
TgDegP 95 LQVSAAGQP-----TE  
HhDegP 111 LQVSAAGQP-----ME

PfDegP 231 KEESIINERLLEN-----LENISLSRTIKDIRGEE-----CNER-----  
PvDegP 347 ARRSIINEKLRRN-----LSQITLSVSAAEERTKE-----RVEEGAEVGAQ----  
PcynDegP 140 AKRSIINEKLHRN-----LKQITLGAAGSGDADGE-----RAEDAKK-GAKDAK  
EtDegP 49 APTGAIQGGLEHE--ANPSAFQ--EFLIEEGAPIESKTGVSNEAERQKSTPEGGYLSA-  
TpDegP 1 -----  
BbDegP 3 YSTSAIYVRIILSQNVKPAAS-----CYTVFGTGNC-FHH-AKVHKHASETD--A----  
NcDegP 199 LAKGLAAAALAKGQISPSRIELAKGLAAAALAKGQISPSR-IELAKGLAAAPA--APAQ-  
TgDegP 106 LAA-----AAAEGVNSQGG-NLAKTLAAAAA----SQ-  
HhDegP 122 LAA-----AAGENVNSQGG-NVLAETLAAAAA----SQ-

PfDegP 265 ----KVKEEDNNIKEEGNSFKKYFKGVVKLYVDITEPNLEMIWQNYPPKSIITGSGFVIEG  
PvDegP 388 ----SVAQSGGADDGEAGALRKIYKGVVKLYVDITEPSLETIWSNSPPKRVS GSGFVIEG  
PcynDegP 183 DAKDIKDARDAKNNAEAGALHNIYRQVVKLYVDITEPSLEMIWSNSPPKRVTGSGFVIEG  
EtDegP 103 ----KPKSTQAKSSVNLTEVEEFASVVKIEVDIAVKADIVSPWQMAPKEQTGSGFVIEG  
TpDegP 1 -----  
BbDegP 49 ----SHDLQFYDYRSHQLIKRSFGSIVKIYCDSTDENYAQPWQMRROLKSI GSGFVIEG  
NcDegP 255 ----KETATQGTRAGRHLISSTLS SVVKIEVDITLDPDYSPWQMQAPKEAS GSGFVIEG  
TgDegP 134 ----KQ---TTAKDRHALLTSTLS SVVKIEVDITMPDYFSPWQMQAPK DAS GSGFVIEG  
HhDegP 150 ----KQ---TTAKDRHALLTSTLS SVVKIEVDITMPDYFSPWQMOSP K DAS GSGFVIEG

PfDegP 321 HLIIITNAHNISYSTRIILIRKHGNSGKYEAKIILYVAHDVDAIILTTDDKTFEDVYALHFG  
PvDegP 444 GLIILTNHNVAYSSTRILVRKHGCSKKYEAGAVLHVAHEADMALLTVADGSEFYEDVSALEIG  
PcynDegP 243 DLIIITNAHNVSAYSSTRILVRKHGSSKKYEATVILHVAHEADIAIILTVSDRSEFYQDVSALEIG  
EtDegP 158 RMIMTNAHLIADQTRVLVRRHGNPKRFLARVLAVCHECDLALMTVDDIVFEWERIKPLAFG  
TpDegP 1 -----MLMVWCRSTRKYIARMIEIGHECDLALMTVDDISFWLGTITPLEFG  
BbDegP 104 RMVLTNAHCVSWHNRCLLRKHGSTIKFPGRIVAI GHECDLALITHVDSEEFWEVGEVPLEIG  
NcDegP 310 KRILTNGHVVAETTRVLVRKHGNAKKFLARVLATAHEADLALLEVDSEEFWENLQPLPFG  
TgDegP 186 KRILTNGHVVGETTRVLVRKHGNAKKFLARVVATAHEADLALLEVSEEFWENLQPLPFG  
HhDegP 202 KRILTNGHVVGETTRVLVRKHGNAKKFLARVVATAHEADLALLEVSGEFWENLQPLPFG

PfDegP 381 ALPSLKDEIITIGYPAGGDKLSVTEGIVSRIDVQYYKHSNYK-----  
PvDegP 504 PLPSLRDDVITVGYPSGGDKLSVTKGIVSRIEVQYYRHSNSR-----  
PcynDegP 303 PLPSLRDDVITVGYPSGGDKLSVTKGIVSRIEVQYYKHSNER-----  
EtDegP 218 GVPQLRETVVVLGYPTGGDQLSITEGVVSRVGVSMYAHSSLG-----  
TpDegP 46 DVPNLHDNVTVIGYPTGGDNLCTISGVVSRVDVITYSHSNFRYLTSLHYLHIFYYTNSV  
BbDegP 164 EVPSLHDAVTVVGYPAGGDNLCITISGVVSRVDVITYAHSNFR-----  
NcDegP 370 GIPRLRDSVTVLGYPTGGDQLSITEGIVSRVGM SAYAHSSVS-----  
TgDegP 246 GIPRLRDSVTVLGYPTGGDQLSITEGIVSRVGM SAYAHSSVS-----  
HhDegP 262 GIPLLRDSVTVLGYPTGGDQLSITEGIVSRVGM SAYAHSSVS-----

PfDegP 423 -----FLLTQIDAPINPGNSGGPALVVRGKVVGICFQSYKVSNNISYIIPSTIISH  
PvDegP 546 -----LILLTQIDAPMNPNGNSGGPALVKGKVAGICFQLLKMANNTSYIIPTPVIKH  
PcynDegP 345 -----LILLTQIDAPMNPNGNSGGPALVKGKVAGICSQLLKTANNTSYIIPTPVIKH  
EtDegP 260 -----LLTVQIDAPINPGNSGGPALAAGKVVGVAFQGFSEMONVGYIVPEPVIKH  
TpDegP 106 FYTFLHTNLQLLCVQIDAAINSGNSGGPALKDGKRVIGVAFQAYDEAQNIGYIIPTCIINQ  
BbDegP 206 -----LLCAQIDAAINAGNSGGPALKDGKVIIGVAFQAYDEAQNIGYIIPTSIVRQ  
NcDegP 412 -----LLTVQIDAAINPGNSGGPAMVDGRVVGVAFAQGFSQLQNVGYIVPYPIVRH  
TgDegP 288 -----LLTVQIDAAINPGNSGGPALVDGRVVGVAFAQGFSHLQNVGYIVPYPIIEH  
HhDegP 304 -----LLTVQIDAAINPGNSGGPALVDGRVVGVAFAQGFSHLQNVGYIVPYPIIEH

PfDegP 473 FLLDIHKNKDYTGAFVLGVKYEPLNPSLREALGLEEMERKKII--KKNVGIILITEVFEG  
PvDegP 596 FLMDLHRSGKYNGYPSLGVKYLPLDNANLRRLGLTDLERRREV--EENSGLIVTEVDEE  
PcynDegP 395 FLDDLHKSCHKYNGYPSLGVKYLPLDNANLRRLVGLTDLKKGKAV--EENSGLIVTEVDEE  
EtDegP 310 FLNDIALHKQHTGIVSLGIIKAQPMENEALKRFKGMDTLPPEALPENVTASGVLVVSVDKV  
TpDegP 166 FLKQIQLFNKYTGTFVNIIGITYQLLTNPFLKSFISHKQHNTL----GLGGIIVCQYDES  
BbDegP 256 FLRQLEIHNRYTGTFVNIIGITYQLLENPALRSFVGLDQINASELPEGITATGILVQCQDKV  
NcDegP 462 FLNDLVLHGRTYTGFPVSLGVKIAHMENDHLRQFKGLSALTAADLPPGVTPGTGILVVEVDNL  
TgDegP 338 FLNDLVLHGRTYTGFPVSLGVKIVSHMENDHLRQFKGLSALKASDLPPGVTPGTGILVVEVDNL  
HhDegP 354 FLNDLVLHGRTYTGFPVSLGVKIVSHMENDQLRQFKGLSALKASDLPPGVTPGTGILVVEVDNL

PfDegP 531 HMSKQDDKYHD-----M-----  
PvDegP 654 QMGCQSGGGGS-----T-----  
PcynDegP 453 QMRYQPADVDY-----C-----  
EtDegP 370 RRTIYTQGKIALPLSRYSQIPESSSAGKRCVRYKAHVGPSIAAFDSSMAKCELMKPIILLV  
TpDegP 222 L-----  
BbDegP 316 P-----  
NcDegP 522 RVSRYKTGQIRVPYASRSLAEPD-----RLELLQELRAQ  
TgDegP 398 RVSRYKAGKIRVPYTSRTLSPRN-----L-KMMQSVQAQ  
HhDegP 414 RVSRYKAGKIRVPYVSRTLSPRN-----L-KMMQRVEVQ

PfDegP 543 -----DNKHNVG-----  
PvDegP 666 -----KWAVS-----  
PcynDegP 465 -----AYAEG-----  
EtDegP 430 D-QVPR--ENDTTEHQNVKEIAARVIWQPENWKPSTAASCSYCHHQQLIPREKRNVLQ  
TpDegP 223 -----  
BbDegP 317 -----  
NcDegP 557 DEESAPPAAEARTSELGAAE--SG-GQMDAPRFELVSA-----  
TgDegP 432 EDVSLPSATSSG---HGASF--S--GSLASPVPDFVKEA-----APPGQMLSAPLGGETP  
HhDegP 448 EDASLPSVTSSG---HGASF--S--GSLASPVPDIVKEA-----APSGQMLSAPLRGETP

PfDegP 551 -----DTHHNVGD-----  
PvDegP 671 -----SGEASTGA-----  
PcynDegP 470 -----ATQA-----  
EtDegP 487 NQKKVSQSGTPEA----ADVQRETGPMQWVKTIQVEDVKGVADAEGSRLLSTVETKEK  
TpDegP 223 -----  
BbDegP 317 -----  
NcDegP 592 ---ASAASGDVQS-----LAHREADGGLAHPAFLQTRITPTHILGSRSQLLRLYLALAR-  
TgDegP 480 ESAVVAAGGGEKPAARAFQGGSEAGPSRSQPTFLQTVTPKHILANRSQLLRLYLALAR-  
HhDegP 496 ESAVVATGGGEKPAARAFQGGSETGPSRSQPTFLQTVIPKHIRASRSQLLRLYLALAR-

PfDegP 559 -----TH-----HNVG---  
 PvDegP 679 -----ASS-----CEASMG---  
 PcynDegP 474 -----  
 EtDegP 542 HLRRVSAQGSTSNREVNEESAPQSGQDARMASPLL RADIESAPQSGQDAKTA SPQLGADT  
 TpDegP 223 -----  
 BbDegP 317 -----  
 NcDegP 642 --RR-----QQVHEVTE-----GA--ASPSEGREL  
 TgDegP 539 --RR-----QLTREAVA-----DEAAA DSGEERGL  
 HhDegP 555 --RR-----QLAREAVA-----DEAAA DSGEERGP

PfDegP 565 -----  
 PvDegP 688 -----  
 PcynDegP 474 -----  
 EtDegP 602 AGVHESTSARSEPATLDLGV RKKAESAGALKYTP TNSSGHGSGDEDDE RQKGQGRPDLRT  
 TpDegP 223 -----  
 BbDegP 317 -----  
 NcDegP 663 VATGHGDRSTPPPIVVMNTVAKLG--PGLYAQIPKG--AFG----PPVIPVSRRLPGIRD  
 TgDegP 562 VETQGARTTAP-PVMVRMVVRKLG--PGIYSQIPEG--DRS----FRARE-GSGFP--KP  
 HhDegP 578 VETQGARTTAPPAAVNMVVRKLG--PGIYSQIPEG--GGS----FRARQGGSGFP--KP

PfDegP 565 -----DDHTDN--QG  
 PvDegP 688 -----AASTGAASSG  
 PcynDegP 474 -----  
 EtDegP 662 QTGQTPVPKRRSHTSNIRASLESLLREILRGSSKLRQVRNILLGR--GGGDES DN RGT  
 TpDegP 223 -----  
 BbDegP 317 -----  
 NcDegP 715 WRL-----QSAPDSAARGENPGVAKDTGHVLEA  
 TgDegP 610 WSA-----FRMLQRR--LRNVQVTARGEKTGGEDTGDLSQD  
 HhDegP 628 WYA-----FRMLQRR--LRNAQMTARGEKAGGEGETGDLSQD

PfDegP 574 DTDY-----CTYILNSNIIT-----SDKKNIYS DK  
 PvDegP 698 EASMG---AASTGAASHAIT-----AGRGP-L---  
 PcynDegP 474 EVSTG---Q-ASSTGAHALA-----TGVPD-F---  
 EtDegP 720 FSATNTRKRAEQASNSNDNTQ--NEDALEKRPPVVSGLKLAGDNTAGSAESNDSSPRSSNT  
 TpDegP 223 -----  
 BbDegP 317 -----  
 NcDegP 743 QEHAQDQAHDEVASGRNAL-----EVQENRVVRG-NARGALPNGS--P---SPTSSEA  
 TgDegP 645 QEAKGNREEPEQVEGKVLVSPENVPGSIQKTGALPV-NMRGPLLSTA--LPGSSSISSFP  
 HhDegP 663 QEAEGRKEPEQVEGKALVLPENVPGSVQKTGVLPV-NMRGPLPPRA--LSDPSSVSSLP

PfDegP 599 KKK-----KIYS-----DNNNNNNNENYNNMH  
 PvDegP 721 -----PGREPITPT  
 PcynDegP 496 -----PRREP---  
 EtDegP 778 SSKELRSEERTATENDAEKRNLEEK SQKYESH DNERETEDTALAVAVHPLVDNPNYENPA  
 TpDegP 223 -----R-  
 BbDegP 317 -----R-  
 NcDegP 790 PNQOTA---RKA-----VEPLEEGPRSEEEELLLPNPYEPPE  
 TgDegP 702 AQEPLS---EKA-----SEAVEEGPRSEEEELLLPNPYEHQ-  
 HhDegP 720 AQDLLS---GKA-----GEAIEEGPRSEEEELLLPNPYEHQ-

PfDegP 622 GEDEQSCYGLKKNDDIILRVGDKDINNDGSVILRDNETVGFQHLFNEKFINDLICIIKLVRN  
PvDegP 730 APAEPLCYGLKKNDDVILSVEGTQIKSDGTVTLRGDESVDFOELFNGKEVGDICTCRVVRG  
PcynDegP 501 --TDAHCYGLKKNDDVILSIDGTQIKSDGTATLRGDESVDFOELFNEKVVQDLICTCRVVRK  
EtDegP 838 FLDEKEFLGFQEGDVILSIGNYS-----MDLERSVSHYVITQYENGFTTWAYVLRD  
TpDegP 224 -----GVIETNDVILQINGHPIADDGTVHFRGDERVHLGYSLTDKFCGDDCELLTLRN  
BbDegP 318 -----PGDRLQTRDVILAINGHVDVADDGTVHFRDVERVHLAYALTNKFTGDFCEVVVLRD  
NcDegP 823 QDVEGGELGLKVGDVILAVDGTDVADDGTVAFRQLERVSIDYTIMNRFNGETCKVIVLRD  
TgDegP 734 QDAEENEIGFKVGDVILAVDGTDVADDGTVAFRQLERVSIDYTIMKRFNGETCKAVVLRD  
HhDegP 752 QDAEENEIGFKVGDVVLAIDGIDVADDGTVAFRQLERVSIDYTIMKRFNGETCKAVVLRD

PfDegP 682 KKIKSVMVKLYKVKYLLNQHNWDKRNKYFIYGGIVFSILTRSLYVYT--QNPEI--NKLM  
PvDegP 790 GRVQTALVRVSRVHYLVRQHNWDVFNKFFIYGGVFTTLTRSLYADEETDNVEV--MRLI  
PcynDegP 559 GRIKSVVVRVSRVNYLVRQHNDRVNRKFFIYGGVIFTTLTRSLYPDEDTDNVEL--LRLL  
EtDegP 889 NRVIKITVPLMTPNFKVPPFTWDMKPSYFVYGGVFTPLSKVLLATKLRKEAPHMGEFLV  
TpDegP 277 NKLKKIHIKLGKPSYLVPEHQWIMPRYYIYAGLVFIPLSMEYIKD----EFGKKEFERA  
BbDegP 373 GVVKTLVHVLQRPSYLVPEHQWEMPRYYIFGGLVVFVPLTMEYIKD----EFGKKEFERA  
NcDegP 883 GRVREILVPIITNLNLKIPRHTWDQKPKYFVFGGLVFTTLTRQLLEHMKAEEFPAHFYTKI  
TgDegP 794 GQVREVLVPIITNLNLKVPAAHTWDQKPKYFVFGGLVFTTLTRHLLLEHMKLTFFPAEFFTKI  
HhDegP 812 GQVREVLVPIITNMNLKVPHTHTWDQKPKYFVFGGLVFTTLTRHLLLEHMKLTFFPTEFENKI

PfDegP 738 L-----YNNFKKKSDEIVVLKNIILPTKIITGYYYTDSIVLVRVNNIKVRNLKHLIELI  
PvDegP 848 Q-----FNLFKKQRDDEIVIVKRIILPSKLTIGFNYQDCIVLTVNGIPVRNLQHLVGI  
PcynDegP 617 Q-----FNLFKKRRGDEIVIVKRIILPSKLTIGFNYTDCIVLTVNGIPVRSIQHLVGI  
EtDegP 949 Q-----RLDYQEEAGDEFVLSLILASDISVGYEVPPCIIVHVSNGHHVRNMQDLVREI  
TpDegP 333 PTALLKPLSDMFARESGEEVVLSQILASDLTIGYDFKNIRIVSVNNTKILNLRHLEQVL  
BbDegP 429 PSALLKPLSDIFADESQEEVVLSQILASDITVGYDFRNVRLEAVNGHSVRNLKHLEYLL  
NcDegP 943 K-----RSEYQEAEGDEVVLSVILASELTVGYNAAPAVTAVCGQKVRGLADVVRIV  
TgDegP 854 K-----QTKYQEEEGDEVVLSVILASELTVGYTAAPAVTAVCGQKVRGLADVVRIV  
HhDegP 872 K-----KAKYQEEEGDEVVLSVILASELTVGYTAAPAFVTAVCGEKVRGLAENVVRIV

PfDegP 791 EMTKYTNRL-----MYLKNN-----KHTLQSYINYNTK----I  
PvDegP 901 DGREGPLGGGVAKKSTQMKQM-----DQMGERRGTPSEGDANPYLKFTLEEDPFFQ  
PcynDegP 670 DKRDGPAGGEAANMANAANMANAANTANTASTANTKEVPSTSGNANPYLMSTLENDPFLH  
EtDegP 1002 EAKD--G-----  
TpDegP 393 LSAV--E-----  
BbDegP 489 QNTLRDS-----  
NcDegP 996 EESK--E-----  
TgDegP 907 EQST--D-----  
HhDegP 925 EQST--D-----

PfDegP 821 TSLNINTIITHILILTTSQQKVPVILNKRDEKYNEEIKKIYSITRDRYVY-----  
PvDegP 952 MKEEKDNLHFLLLTSNGQVPLVLLRAEVQRESAEIRRVYGITREYRYVYSG-----  
PcynDegP 730 VQ-EKDNLHFLLLTSNGQVPLVLLRNEVQESAEIKRVYGITREYRYLYNG-----  
EtDegP 1007 -----DFVELQLEANEADKLVAVTDRKKAAAIQQKVLKDHNIIVSDRSPDLIRKKINSL  
TpDegP 398 -----KYVVKQFE----QDILVVLETAKVPEFEQQILQOHATSAHKSRII-----  
BbDegP 496 -----PYLTFKFD----GEVILVLDRIKAEELHPLILEQHAI PAHKSREL-----  
NcDegP 1001 -----NFLEFTVKVSGISQMPIVLD RQKAMAVNPKILGQHKILRDRSYEL-----  
TgDegP 912 -----NFLEFTVKISGISALPIVLD RKKAMAVNPKILGQHKILRDRSYEL-----  
HhDegP 930 -----NFLEFTVKISGISQLPIVLD RKKAMAVNPKILGQHKILRDRSYEL-----

**B**

EtDegP 1 -----  
NcDegP 1 MMAEQDRDRSQRARWTAR---ALFLLAWLAVGLEMLFVNSNSSFVCPKAHVEVSSSSAER  
TgDegP 1 -----MLLLLSLFFVALEVSSWISSDSVVSILKAHGAEASSLLT--  
HhDegP 1 -----MAALQRSRWPRARTGMVLLLLLSVFEVALEVP SWIASYSVVPLKAHGAETSSLLT--

EtDegP 1 -----  
NcDegP 58 SFSPASTHSPGPRDAAPKLEAASDQGPLASDTLFLDPSTTSTDEGSAEERFQHLLEDEF  
TgDegP 38 -----PEPS-----R-----DLRE--  
HhDegP 54 -----PEPS-----R-----DLRE--

EtDegP 1 -----MRIILALSLSLTATFVDSYLLVTNEVGNTPASS  
NcDegP 118 EHSTSGTAQHSPREEDIAVPQDGSESPFTAFISESEPGEESFEPST-RTPREPTETPAAF  
TgDegP 47 -----DATVLHEDGFVSTFPAAVATSAHGAEPLPPER-EITEEVTGEMLVGS  
HhDegP 63 -----DAAVLHEDGFVSTFPAAVATSAQVAEQLETER-EITEEVAGEMLVGS

EtDegP 35 -----ASTGNGGVSLGFKDAPTGAIQGGLHE--ANPSAFQE---FSLIEECAPTESK  
NcDegP 177 SFLQVNAAAALAKGQISPSRIELAKGLAAAALAKGQISPSRIELAKGLAAAALAKGQISP  
TgDegP 93 SLLQVSAAGQP-----TELA-----AAAEVNSQ  
HhDegP 109 SLLQVSAAGQP-----MELAA-----AAGENVNSQ

EtDegP 82 TGSVNEAERQKSTPEGGYLSAKRKSITQAKSSVNLTEVEEFA SVVKIFVDVAVKADVSPWQ  
NcDegP 237 SR-IELAKGLAAAPA--APAQKETATQGTTRAGRHLSSSTLSSVVKIFVDFTIPDYVSPWQ  
TgDegP 118 GG-NTLAKTLAAAAA---SQKQ---TTAKDRHALLTSSLSSVVKIFVDITMPDYFSPWQ  
HhDegP 134 GG-NVLAETLAAAAA---SQKQ---TTAKDRHALLTSSLSSVVKIFVDITMPDYFSPWQ

EtDegP 142 MMAPKEQTGSGFVVEGRMIMTNAHLIADQTRVLVRRHGKPKRFLARVAVCHECDLALVT  
NcDegP 294 MQAPKEASGSGFVVEGKRILTNGHVVAETTRVLVVRKHGNAKKFLARVATAHEADLALLE  
TgDegP 170 MQAPK DASGSGFVVEGKRILTNGHVVGETTRVLVVRKHGNAKKFLARVATAHEADLALLE  
HhDegP 186 MQSPK DASGSGFVVEGKRILTNGHVVGETTRVLVVRKHGNAKKFLARVATAHEADLALLE

EtDegP 202 VDDVFWERIKPLAFGGVPLRETVVVLGYPTGGDQLSITEGVVSRVGVSMYAHSSVGLL  
NcDegP 354 VDSEEFWENLQPLPFGGIPRLRDSVTVLGYPTGGDQLSITEGIVSRVGM SAYAHSSVSL  
TgDegP 230 VESDEFWENLQPLPFGGIPRLRDSVTVLGYPTGGDQLSITEGIVSRVGM SAYAHSSVSL  
HhDegP 246 VESGEFWENLQPLPFGGIPRLRDSVTVLGYPTGGDQLSITEGIVSRVGM SAYAHSSVSL

EtDegP 262 TVQIDAPINPGNSGGPALAAGKVVGVAFQGFSEMQNVGYIVPYPVIRHFLNDLALHKQHT  
NcDegP 414 TVQIDAAINPGNSGGPAVVDGRVVGVAFAFGFSQLQNVGYIVPYPVIRHFLNDLVLHGRYT  
TgDegP 290 TVQIDAAINPGNSGGPALVDGRVVGVAFAFGFSHLQNVGYIVPYPVIRHFLNDLVLHGRYT  
HhDegP 306 TVQIDAAINPGNSGGPALVDGRVVGVAFAFGFSHLQNVGYIVPYPVIRHFLNDLVLHGRYT

EtDegP 322 GIVSLGIIKAQPMENEALKRFGMDTLPPEALPENVTASGVLVVSVDKVRRIIYTOGKIAL  
NcDegP 474 GFPSLGVKIAHMENDHLRQFKGLSALTAAADLPPGVTPTGVLVVEVDNLRVSRYKTCQIRV  
TgDegP 350 GFPSLGVKVSHMENDHLRQFKGLSALKASDLPPGVTPTGVLVVEVDNLRVSRYKAGKIRV  
HhDegP 366 GFPSLGVKVSHMENDQLRQFKGLSALKASDLPPGVTPTGVLVVEVDNLRVSRYKAGKIRV

EtDegP 382 PLSRYSQIPESSSAGKRCVRYKAHVGPSIAAFDSSMAKCEIMKPTLLVD-QVPR--END  
NcDegP 534 PYASRSIAEPRDR-----LELQETRAQDEESAPFAEAR  
TgDegP 410 PYTSRITLSGPRNL-----KMMQSVQAEVDVSLPSATSSG  
HhDegP 426 PYVSRTLSGPRNL-----KMMQRVEVQEDASLPSVITSSG

EtDegP 439 TTEHQ<sup>1</sup>RVKEIAARVIWQ<sup>2</sup>PENWKPSTA<sup>3</sup>AASCSYCHHQ<sup>4</sup>QLI<sup>5</sup>PREKR<sup>6</sup>NVLQ<sup>7</sup>NQKK<sup>8</sup>V<sup>9</sup>SQSG<sup>10</sup>TPE  
NcDegP 569 TSELGAAES--G-GQMDAPRFEI<sup>1</sup>VSA-----ASAASGDVQ  
TgDegP 444 ---HGASFS---GSLASVPVDFVKEA---APPQ<sup>1</sup>QMLSAP<sup>2</sup>IGGET<sup>3</sup>PESAVVAAGGGEK  
HhDegP 460 ---HGASFS---GSLASVPVDIVKEA---APS<sup>1</sup>QMLSAP<sup>2</sup>LRGET<sup>3</sup>PESAVVATGGGEK

EtDegP 499 A-----ADVQRET<sup>1</sup>GPMQWVKTI<sup>2</sup>VQVEDV<sup>3</sup>KGVADA<sup>4</sup>EGSR<sup>5</sup>LLSTVETKEKHL<sup>6</sup>RRVSAQGSTS  
NcDegP 601 S-----LAHREADGGLAHPAFLQTRITPT<sup>1</sup>THIL<sup>2</sup>CSRSQ<sup>3</sup>LLRLYALAR---RR-----QQ  
TgDegP 492 PAARAFGQGGSEAGPSRSQPTFLQ<sup>1</sup>TQVTPKHILAN<sup>2</sup>RSQ<sup>3</sup>LLRLYALAR---RR-----QL  
HhDegP 508 PAARAFGQGGSETG<sup>1</sup>PSRSQPTFLQ<sup>2</sup>TQVTPKHIR<sup>3</sup>ASRSQ<sup>4</sup>LLRLYALAR---RR-----QL

EtDegP 554 NREVNEESAPQSGQDARMASPLLRADIESAPQSGQ<sup>1</sup>DAKT<sup>2</sup>ASPQLGADTAGVHEST<sup>3</sup>SARSE  
NcDegP 646 VHEVTE-----GA--ASPSE<sup>1</sup>GRELVAT<sup>2</sup>GHC<sup>3</sup>DRSTPP  
TgDegP 543 TREAVA-----DEAAADS<sup>1</sup>GEERGLVETQ<sup>2</sup>GARTTAP-  
HhDegP 559 AREAVA-----DEAAADS<sup>1</sup>GEERGFVETQ<sup>2</sup>GARTTAPP

EtDegP 614 PATLDL<sup>1</sup>GV<sup>2</sup>RKKAESAGALKYTP<sup>3</sup>TNSS<sup>4</sup>GHGSGDEDDE<sup>5</sup>RQK<sup>6</sup>QGR<sup>7</sup>DL<sup>8</sup>FTQ<sup>9</sup>QTPV<sup>10</sup>PKRR  
NcDegP 675 PIVVNMT<sup>1</sup>VAKLG--PGIYAQ<sup>2</sup>IPK<sup>3</sup>G--AFG---PPVIPVSRRL<sup>4</sup>EGIR<sup>5</sup>DWRL-----  
TgDegP 573 PVMV<sup>1</sup>RMVVRKLG--PGIYSQ<sup>2</sup>IPEG--DRS---FRARE--GSGFP--KPWSA-----  
HhDegP 590 PAAV<sup>1</sup>NMVVRKLG--PGIYSQ<sup>2</sup>IPEG--GGS---FRARQ<sup>3</sup>GSGFP--KPWYA-----

EtDegP 674 SHTSNIRASLESLLREIL<sup>1</sup>RGSSK<sup>2</sup>LRO<sup>3</sup>VNRNILLGR--GGDES<sup>4</sup>DNLRGTF<sup>5</sup>SA<sup>6</sup>TNT<sup>7</sup>KR<sup>8</sup>KAEQ  
NcDegP 718 -----QSAPDSAARGENP<sup>1</sup>GVAK<sup>2</sup>DTGHV<sup>3</sup>LEAQ<sup>4</sup>OEHAQ<sup>5</sup>DQAHDEV  
TgDegP 613 -----FRML<sup>1</sup>QRR--LRNVQ<sup>2</sup>VTARGEKT<sup>3</sup>GGED<sup>4</sup>ETGDL<sup>5</sup>SQDQEAK<sup>6</sup>GNRE<sup>7</sup>EPEQ  
HhDegP 631 -----FRML<sup>1</sup>QRR--LRNAQ<sup>2</sup>MTARGEKA<sup>3</sup>GGEG<sup>4</sup>ETGDL<sup>5</sup>SQDQEA<sup>6</sup>EGDR<sup>7</sup>EPEQ

EtDegP 732 ASNSNDNTQ--NEDALE<sup>1</sup>KRPV<sup>2</sup>VVSGLKL<sup>3</sup>AGDNTAGSAE---SNDSS<sup>4</sup>PRSS<sup>5</sup>NTSSKEL<sup>6</sup>RSEE  
NcDegP 755 ASGRNAL-----EVQENR<sup>1</sup>VV-----RGNARGALE<sup>2</sup>NGSP--SPTSSEAP<sup>3</sup>NQQTAA---  
TgDegP 657 VEGKVL<sup>1</sup>VSPENVPGSI<sup>2</sup>QKTGAI-----PVNMRG<sup>3</sup>PILSTAL<sup>4</sup>PGSS<sup>5</sup>TSSE<sup>6</sup>PAQ<sup>7</sup>EPLS---  
HhDegP 675 VEGKAL<sup>1</sup>VLPENVPGSVQKTGVI-----PVNMRG<sup>2</sup>PLP<sup>3</sup>RAIS<sup>4</sup>DPSS<sup>5</sup>VSSL<sup>6</sup>PAQ<sup>7</sup>ELLS---

EtDegP 787 RTATENDAAE<sup>1</sup>KRNLEEKSQ<sup>2</sup>KYESHDNER<sup>3</sup>ETED<sup>4</sup>TALAVAVHPL<sup>5</sup>MDN<sup>6</sup>PYEN<sup>7</sup>PAFL<sup>8</sup>DEKE<sup>9</sup>FTG  
NcDegP 796 RKA-----VEPI<sup>1</sup>EEGPR<sup>2</sup>SEEE<sup>3</sup>LLLP<sup>4</sup>NPY<sup>5</sup>FPPE<sup>6</sup>QV<sup>7</sup>EGGE<sup>8</sup>FTG  
TgDegP 708 EKA-----SEAVE<sup>1</sup>EGPR<sup>2</sup>SEEE<sup>3</sup>LLLP<sup>4</sup>NPY<sup>5</sup>FHQ--QDAE<sup>6</sup>ENE<sup>7</sup>FTG  
HhDegP 726 GKA-----GEAVE<sup>1</sup>EGPR<sup>2</sup>SEEE<sup>3</sup>LLLP<sup>4</sup>NPY<sup>5</sup>FHQ--QDAE<sup>6</sup>ENE<sup>7</sup>FTG

EtDegP 847 FQEGDVILS<sup>1</sup>IGNYS-----MDL<sup>2</sup>ERVS<sup>3</sup>FHYV<sup>4</sup>ITQY<sup>5</sup>FNGET<sup>6</sup>TWAY<sup>7</sup>VLRD<sup>8</sup>NRV<sup>9</sup>IK<sup>10</sup>ITVP  
NcDegP 832 LKVG<sup>1</sup>DVILAVDGT<sup>2</sup>DVADDGT<sup>3</sup>VAFRQ<sup>4</sup>LERS<sup>5</sup>IDYTIM<sup>6</sup>NRFNGET<sup>7</sup>TCKV<sup>8</sup>LVRD<sup>9</sup>GRVRE<sup>10</sup>ILVP  
TgDegP 743 FKVG<sup>1</sup>DVILAVDGT<sup>2</sup>DVADDGT<sup>3</sup>VAFRQ<sup>4</sup>LERS<sup>5</sup>IDYTIM<sup>6</sup>KRFNGET<sup>7</sup>TCKAL<sup>8</sup>VLRD<sup>9</sup>GQVRE<sup>10</sup>ILVP  
HhDegP 761 FKVG<sup>1</sup>DV<sup>2</sup>VLAIDGIDVADDGT<sup>3</sup>VAFRQ<sup>4</sup>LERS<sup>5</sup>IDYTIM<sup>6</sup>KRFNGET<sup>7</sup>TCKAL<sup>8</sup>VLRD<sup>9</sup>GQVRE<sup>10</sup>ILVP

EtDegP 898 LMTPN<sup>1</sup>FKVPPFT<sup>2</sup>WDMK<sup>3</sup>PSYFVY<sup>4</sup>GGFV<sup>5</sup>FTPL<sup>6</sup>SKV<sup>7</sup>LLAT<sup>8</sup>KLRKEA<sup>9</sup>FHME<sup>10</sup>GFLV<sup>11</sup>QR<sup>12</sup>LDYQ<sup>13</sup>EEA  
NcDegP 892 ITNLN<sup>1</sup>LKI<sup>2</sup>PRHT<sup>3</sup>WDQ<sup>4</sup>KPKY<sup>5</sup>FVFG<sup>6</sup>GLVFT<sup>7</sup>TLTR<sup>8</sup>QLLE<sup>9</sup>HMKAAE<sup>10</sup>FPA<sup>11</sup>H<sup>12</sup>FY<sup>13</sup>TKI<sup>14</sup>KRSE<sup>15</sup>YQ<sup>16</sup>EAE  
TgDegP 803 ITNLN<sup>1</sup>LKVPAHT<sup>2</sup>WDQ<sup>3</sup>KPKY<sup>4</sup>FVFG<sup>5</sup>GLVFT<sup>6</sup>TLTR<sup>7</sup>HLL<sup>8</sup>EHMKL<sup>9</sup>TEF<sup>10</sup>PAE<sup>11</sup>FF<sup>12</sup>TKI<sup>13</sup>KQ<sup>14</sup>KY<sup>15</sup>QEEE  
HhDegP 821 ITNM<sup>1</sup>NLKVPT<sup>2</sup>HT<sup>3</sup>WDQ<sup>4</sup>KPKY<sup>5</sup>FVFG<sup>6</sup>GLVFT<sup>7</sup>TLTR<sup>8</sup>HLL<sup>9</sup>EHMKL<sup>10</sup>TEF<sup>11</sup>PT<sup>12</sup>TEFF<sup>13</sup>N<sup>14</sup>KI<sup>15</sup>K<sup>16</sup>AKY<sup>17</sup>QEEE

EtDegP 958 GDEFVVLSTILASDISVGYEVPCCIVHSVNGHHVVRNMQDIVRFLEAKDGFVQLQLEANE  
NcDegP 952 GDEVVLSVILASELTVGYNAAPAIVTAVQGQKVRGLADVVRIVEESKFNLEFTVKVSG  
TgDegP 863 GDEVVLSVILASELTVGYTAAPAIVTAVQGQKVRGLADVVRIVEQSTDNFLEFTVKISG  
HhDegP 881 GDEVVLSVILASELTVGYTAAPAFVTAVQGEKVRGLAEVVRIVEQSTDNFLEFTVKISG

EtDegP 1018 ADKLHVAVDRKKAAAIQQKVLKDHNIIVSDRSPDLIRKKINSL  
NcDegP 1012 ISQMPIVLDRQKAMAVNPKILGQHKILRDRSEFL-----  
TgDegP 923 ISALPIVLDRKKAMAVNPKILGQHKILRDRSYFL-----  
HhDegP 941 ISQLPIVLDRKKAMAVNPKILGQHKILRDRSYFL-----
